# Evolutionary trajectories and transmission dynamics of multidrug-resistant

## *Mycobacterium tuberculosis* in Tibet, China

Qi Jiang<sup>1,2</sup>, Hai-can Liu<sup>3</sup>, Qing-yun Liu<sup>1,4</sup>, Jody E. Phelan<sup>5</sup>, Li Shi<sup>6</sup>, Min Gao<sup>3</sup>, Xiu-qin Zhao<sup>3</sup>, Jian Wang<sup>7</sup>,  
Judith R. Glynn<sup>8</sup>, Chong-guang Yang<sup>9</sup>, Howard E. Takiff<sup>10, 11, 12</sup>, Kang-lin Wan<sup>3\*</sup>, Taane G. Clark<sup>5,8\*</sup>, Qian  
Gao<sup>1\*</sup>

### Affiliations:

<sup>1</sup> Key Laboratory of Medical Molecular Virology, School of Basic Medical Sciences, Shanghai Medical College and Shanghai Public Health Clinical Center, Fudan University, Shanghai, China 200032

<sup>2</sup> School of Health Sciences, Wuhan University, Wuhan, China 430071

<sup>3</sup> State Key Laboratory for Infectious Disease Prevention and Control and National Institute for Communicable Disease Control and Prevention, Chinese Center for Disease Control and Prevention, Beijing, China 102206

<sup>4</sup> Department of Immunology and Infectious Diseases, Harvard T. H. Chan School of Public Health, Boston, Massachusetts, USA 02115

<sup>5</sup> Department of Infection Biology, London School of Hygiene & Tropical Medicine, London, UK WC1E 7HT

<sup>6</sup> Tibet Autonomous Region People's Hospital, Lhasa, Tibet Autonomous Region, China 850000

<sup>7</sup> Tibet Center for Disease Control and Prevention, Lhasa, Tibet Autonomous Region, China 850000

<sup>8</sup> Department of Infectious Disease Epidemiology, London School of Hygiene & Tropical Medicine, London, UK WC1E 7HT

<sup>9</sup> Department of Epidemiology of Microbial Diseases, Yale School of Public Health, Yale University, New Haven, CT, USA 06510

<sup>10</sup> Integrated Mycobacterial Pathogenomics Unit, Institut Pasteur, Paris, France 75015

<sup>11</sup> Laboratorio de Genética Molecular, CMBC, IVIC, Caracas, Venezuela

<sup>12</sup> Shenzhen Nanshan Center for Chronic Disease Control, Shenzhen, China.

\* Corresponding authors

Qian Gao, Key Laboratory of Medical Molecular Virology, School of Basic Medical Sciences, Fudan University, Shanghai, China 200032; E-mail: qiangao@fudan.edu.cn

Taane G. Clark, London School of Hygiene & Tropical Medicine, London, United Kingdom WC1E 7HT; E-mail: taane.clark@lshtm.ac.uk

Kanglin Wan, Chinese Center for Disease Control and Prevention, Beijing, China 102206; E-mail: wankanglin@icdc.cn

Word counts: Abstract 250/250; Main text 3461/3500; Reference 26/40

Key words: Tuberculosis; Drug resistance; Transmission; Whole-genome sequencing; Phylodynamic analysis.

37 **ABSTRACT**

38 **Objective** Tibet has the highest prevalence of both tuberculosis disease and multidrug-resistant tuberculosis  
39 (MDR-TB) in China. The circulated *Mycobacterium tuberculosis* strains from Tibet were sequenced to  
40 investigate the underlying drivers for the high burden of MDR-TB.

41 **Methods** Using whole-genome sequencing data of 576 *M. tuberculosis* strains isolated from consecutive  
42 patients in Tibet, we mapped resistance-conferring mutations onto phylogenetic trees to determine their  
43 evolution and spread. The impact of drug resistance on bacterial population growth was assessed with a  
44 Bayesian (Skyline Plot) analysis. Multivariable logistic regression was used to identify risk factors for the  
45 development of rifampicin resistance.

46 **Results** Of the 576 isolates, 284 (49.3%), 280 (48.6%), and 236 (41.0%) were, respectively, genetically  
47 resistant to isoniazid, rifampicin, or both (MDR-TB). Among the isoniazid- and rifampicin-resistant strains,  
48 the proportions in phylogenetically-inferred clusters were 77.8% (221/284) and 62.1% (174/280),  
49 respectively. Nearly half (47.2%, 134/284) of the isoniazid-resistant strains were in six major clades, which  
50 contained between 8 and 58 strains with *katG* S315T, *katG* S315N, or *fabG1* promoter -15 C>T resistance  
51 mutations. These major clades exponentially expanded after emerging with isoniazid resistance and stabilized  
52 before evolving into MDR-TB twenty years later. Isoniazid-resistant isolates showed an increased risk of  
53 accumulating rifampicin resistance compared to isoniazid-susceptible strains, with an adjusted odds ratio of  
54 3.81 (95% confidence interval 2.47-5.95).

55 **Conclusion** Historical expansion of isoniazid-resistant strains and their increased likelihood of acquiring  
56 rifampicin resistance both contributed to the high burden of MDR-TB in Tibet, highlighting the need to detect  
57 INH-resistant strains promptly and to control their transmission.

58

59

## 60 INTRODUCTION

61 Drug resistance in *Mycobacterium tuberculosis* (*M. tuberculosis*) greatly hinders the control of tuberculosis  
62 disease (TB). Approximately half a million new TB cases with resistance to rifampicin (RIF, R) occurred  
63 globally in 2019, of which 78% were also resistant to isoniazid (INH, H) and therefore multidrug-resistant  
64 (MDR)<sup>1</sup>. China has the second-largest percentage of global MDR-TB (14%), exceeded only by India (27%).  
65 In 2019, China had approximately 65,000 cases of MDR-TB, with high rates among both retreated (23%) and  
66 newly diagnosed TB cases (7.1%)<sup>1</sup>. Tibet (Xizang), an provincial autonomous region of China, has burdens of  
67 both TB and MDR-TB that are considerably higher than in other areas of China, with an estimated prevalence  
68 of TB that reached 758/100,000 population in 2014<sup>2</sup>. In the provincial capital city Lhasa, 21% of new and  
69 57% of retreated cases had MDR-TB<sup>3</sup>.

70 As Tibet is relatively isolated and historically has had limited population exchange with other parts of China,  
71 it seemed feasible to trace the evolution of drug resistance and transmission dynamics that shaped its high  
72 burden of MDR-TB. To investigate the potential factors responsible for its high burden of MDR-TB, we  
73 whole-genome sequenced both susceptible and resistant Tibetan *M. tuberculosis* isolates. The resulting  
74 sequence data were used to assess the level of *M. tuberculosis* transmission, to perform a phylodynamic  
75 analysis to reconstruct the evolution of drug resistance in the local clades and to determine the impact of drug  
76 resistance on the expansion of the bacterial populations.

77

## 78 METHODS

### 79 Study site and sampling

80 Tibet is located on the world's highest plateau, with an average altitude of over 4,000 metres above sea level.  
81 Its large expanse of 1.2 million square kilometres constitutes nearly an eighth of China's entire landmass but  
82 contains only 3.3 million inhabitants (< 3 people per square-kilometre). As part of a previous study<sup>4</sup>, a total of  
83 576 *M. tuberculosis* isolates were collected from consecutive patients with positive cultures at seven  
84 municipal-level clinics in Tibet over two periods -- during the years 2006, and 2009-2010. Genotyping of  
85 these isolates showed that the great majority (89%, 512/576) belonged to the Beijing lineage (Spoligotype  
86 ST1 strains), with limited genetic diversity<sup>4</sup>.

### 87 Whole-genome sequencing and SNP calling

88 Genomic DNA of the *M. tuberculosis* isolates was extracted with the cetyltrimethylammonium bromide  
89 (CTAB) method<sup>5</sup>. A 300-base-pair double-ended DNA library of each isolate was sequenced on the Illumina  
90 HiSeq 2500 platform with an expected depth of 100-fold. Raw sequence reads were trimmed with Sickle  
91 software to remove reads of low quality (Phred base quality < 20 or read length < 10) and aligned to the  
92 H37Rv reference genome (AL123456.3) using BWA-MEM. The SAMtools software suite was applied to the  
93 alignments to call single nucleotide polymorphisms (SNPs). Fixed mutations with a frequency  $\geq 75\%$  were

94 identified by VarScan. We defined genetic-clustered strains as those within a threshold genetic distance of  
95 five or fewer SNPs<sup>6</sup>.

### 96 **Phylogeny construction and phylodynamic analysis**

97 The identified SNPs were used to construct a phylogeny tree using RAxML software<sup>7</sup>, which implemented a  
98 maximum-likelihood method with a general time-reversible model of nucleotide substitution with main node  
99 values over 0.7 from 500 bootstrapping trees. Aligned sequences were also analysed using BEAST2 software  
100 (version 2.6.1)<sup>8</sup> to construct a dated phylogeny based on a molecular clock with an uncorrelated log-normal  
101 distribution and a tree prior using Coalescent Bayesian Skyline. The molecular clock was set at 1.14 (0.49-  
102  $1.80) \times 10^{-7}$  substitutions per site per year, a mutation rate reported elsewhere for lineage 2 strains<sup>9</sup>. Bayesian  
103 skyline plots for the effective population size were reconstructed in Tracer software<sup>10</sup>, with the age of the most  
104 recent common ancestor (MRCA) node being the height of the tree. The phylogenies were visualized with  
105 iTOL (version 5)<sup>11</sup>.

### 106 **Determination of transmitted and acquired genotypic resistance**

107 Known drug resistance mutations with a frequency  $\geq 5\%$  in the sequence alignments were identified using the  
108 TB-profiler tool<sup>12</sup> based on a published database of mutations conferring resistance to 14 anti-TB drugs<sup>13</sup>.  
109 Both transmitted and acquired resistance were determined by mapping these mutations onto a phylogenetic  
110 tree<sup>14</sup> and defined by the following rules: mutations shared by all strains on a branch were considered to be  
111 present at the MRCA of the branch and termed “transmitted resistance”, and these strains were considered to  
112 be phylogenetically clustered (phylo-clustered); while mutations on single branches and not present in  
113 neighbouring branches were regarded as having occurred at the terminal tip and termed “acquired resistance”.  
114 To further investigate the population growth and resistance evolution for large drug-resistant phylo-clusters,  
115 we also analysed strains on their neighbouring drug-sensitive sister branches that derived from the same  
116 ancestral nodes in the phylogeny tree.

### 117 **Data management and statistical analysis**

118 A structured questionnaire obtained basic demographic and clinical information from enrolled patients after  
119 they signed an informed consent form, which had been reviewed and approved by the Ethical Review Board  
120 of the Chinese Center for Disease Control and Prevention (CDC). The data included: gender, age, occupation,  
121 location of residence, sampling year, BCG vaccination, TB history and smear results. The anonymized data  
122 were stored in Excel spreadsheets after double entry into EpiData (version 3.1). Univariable and multivariable  
123 logistic regression were used to assess the association of risk factors for drug resistance and to estimate the  
124 odds ratios (OR) and 95% confidence intervals (CIs). All statistical analyses were performed in R software  
125 (version 3.6.1).

126

## 127 **RESULTS**

## 128 **Basic demographic and genetic characteristics**

129 A total of 576 clinical isolates were collected from pulmonary TB patients in Tibet during the years 2006 and  
130 2009-2010. More than half (53.0%, 305/576) of the samples came from TB clinics in Lhasa, the provincial  
131 capital, and the remainder from clinics in the other six administrative districts of Tibet (**Suppl. Figure 1**).  
132 Among 561 patients for whom the survey data were available, 325 (58.0%) were male, the median age was 32  
133 years (interquartile range 25-43), and 288 (51.3%) reported a previous history of TB treatment (**Table 1**).

134 The whole-genome sequences of the 576 *M. tuberculosis* clinical isolates had an average depth of 79-fold  
135 (range 22- to 137-fold). A total of 2,433,862 SNPs were identified, of which 1,389 were resistance-conferring  
136 mutations across 14 anti-TB drugs. A maximum-likelihood phylogeny tree constructed using all SNPs  
137 (**Figure 1**) revealed that the great majority of isolates (524, 91.0%) belonged to Beijing Lineage 2, with a  
138 minority belonging to the Euro-American Lineage 4 (36, 6.3%) or Central Asian Lineage 3 (16, 2.8%). From  
139 the genotypic resistance profiles, 231 (40.1%) isolates were pan-susceptible while the other 345 (59.9%)  
140 strains were resistant to at least one anti-TB drug, including 236 (41.0%) that were MDR-TB. The proportions  
141 of new and retreated patients with MDR-TB were 19.0% (52/273) and 60.4% (174/288), respectively (**Table**  
142 **1**).

143 Although many studies have used thresholds between 5 and 12 SNPs to define a genetic cluster<sup>6,15</sup>, the Tibet  
144 strains showed no clear separation but rather a gradual decrease in the distribution of the SNP differences  
145 between strains (**Figure 2**). Using a limit of 5 SNPs to define clustered strains, Lineage 2 strains were nearly  
146 twice as likely to be in genetic clusters (39.3%, 206/524) as the few Lineage 4 strains collected (22.2%, 8/36);  
147 and MDR-TB strains showed significantly more clustering (47.0%, 111/236) than either pan-susceptible strains  
148 (31.2%, 72/231) or those with other resistance profiles (30.3%, 33/109) ( $P<0.001$ ) (**Figure 2**). The resistance  
149 profiles among different lineages did not show a significant difference (**Suppl. Table 1**).

## 150 **Transmitted drug resistance**

151 The mutations conferring drug resistance in *M. tuberculosis* strains have different fitness costs that can affect  
152 their transmissibility<sup>16</sup>. Most INH-resistant strains carried the low-fitness cost *katG* S315T mutation and  
153 showed a clustering rate of 41.8% (74/177), using the 5-SNP limit. Although strains carrying other INH-  
154 resistance mutations were much less common, they all had higher clustering rates than the pan-sensitive  
155 strains, except for those with the *katG* S315N mutation (**Table 2**). Among 280 RIF-resistant strains, the most  
156 frequent mutation was the low-fitness cost *rpoB* S450L (99, 35.4%). The next most common was the *rpoB*  
157 H445Y (42, 15.0%) mutation and there were a few strains with two other substitutions of the same amino  
158 acid, all of which had higher clustering rates (*rpoB* H445Y/D/R, combined 51.3% [41/80]) than strains with  
159 *rpoB* S450L (37.4% [37/99]) (**Table 2**).

160 Mapping the resistance-conferring mutations on the phylogenetic tree showed that 77.8% (221/284) of strains  
161 resistant to INH and 62.1% (174/280) resistant to RIF, belonged to phylo-clusters that resulted from the  
162 transmission of resistance mutations from parental strains (**Table 2**). Even higher proportions of strains

163 resistant to SM (82.7%, 191/231) or PAS (96.0%, 72/75) resulted from transmitted resistance, as well as over  
164 half of strains resistant to the other first-line drugs ethambutol (EMB, E) (57.1%, 97/170) and pyrazinamide  
165 (PZA, Z) (52.1%, 63/121) (**Suppl. Table 2**). The sizes of the INH-resistant phylo-clusters were generally  
166 larger than those with RIF resistance (**Table 2**). There were four large phylo-clusters of strains with the *katG*  
167 S315T mutation, each containing more than ten strains, while the RIF resistant clusters had, at most, seven  
168 strains. To reconstruct the growth history of the bacterial population and the trajectories of resistance  
169 accumulation, we focused on six large phylo-clusters that contained more than eight strains. In total, these six  
170 large phylo-clusters included nearly half of the INH-resistant isolates (47.2%, 134/284) or of the MDR-TB  
171 strains (48.7%, 115/236). For further analysis, each of these six phylo-clusters, together with their sister  
172 branches, were considered as clades, labelled A-F (**Figure 1**).

### 173 **Evolutionary trajectories of drug resistance in the major clades**

174 To determine when these six clades developed antibiotic resistance to each drug, we constructed dated  
175 phylogenetic trees for each, and estimated the evolutionary time to the appearance of nodes whose offspring  
176 strains all harboured the same resistance-conferring mutations. All of these clades first evolved INH resistance  
177 conferred by acquiring *katG* S315T (Clades B-E), *katG* S315N (Clade A) or *fabG1* promoter -15 C>T (Clade  
178 F) mutations, and subsequently evolved into phylo-clusters containing between 8 and 58 INH-resistant strains  
179 (**Table 3**). In five of these six clades, the mutations conferring INH resistance were acquired around year 1970  
180 (95% CI 1967-1975), and the remaining Clade D acquired the *katG* S315T around 1989 (95% CI 1980-1998).  
181 Three clades (B, D and E) also acquired SM resistance at around the same time as INH resistance, and one  
182 clade (C) acquired additional resistance to PAS (**Figure 3; Suppl. Figure 2**).

183 In all six clades, RIF resistance developed after 1990, much later than INH resistance and consistent with the  
184 time period in which RIF became widely used for treating TB in Tibet. Notably, each clade contained strains  
185 with different RIF-resistance-conferring mutations, with no single mutation being dominant. Similarly, nearly  
186 all clades contained more than one mutation conferring resistance to the other first-line drugs EMB and PZA.  
187 After these clades developed INH resistance, mutations conferring RIF resistance occurred between 4 and 23  
188 times independently in different sub-clades, while EMB and PZA resistance occurred 2 to 13 times and 1 to  
189 11 times, respectively (**Table 3**). Amongst all the sampled isolates, we identified 110 independent mutational  
190 events for INH resistance and 161 for RIF resistance, among which 31.8% (35/110) and 34.8% (56/161),  
191 respectively, were transmitted to secondary strains in the phylo-clusters (**Suppl. Table 2**)

192 Taking the largest clade, Clade C, as an example to illustrate the evolutionary trajectories in detail (**Figure 3**),  
193 all 58 phylo-clustered strains of Clade C carried the same mutations for INH (*katG* S315T) and PAS  
194 resistance (*thyX* promoter -16 C>T and *thyA* large segment deletion), both of which were estimated to have  
195 occurred around year 1968 (95% CI 1958-1977). Resistance to SM was subsequently acquired around year  
196 1972, with simultaneous mutations of either *rpsL* K88R (1963-1980) or *rpsL* K43R (1962-1981), creating two  
197 sub-clades resistant to all drugs in the triple TB therapy used at the time (INH, SM and PAS). The mutations

198 conferring resistance to RIF occurred more than 20 years later on at least 23 descendent branches of this  
199 clade, resulting in 12 RIF-resistant phylo-clusters of 2-6 strains, and another 11 non-clustered RIF-resistant  
200 strains (**Figure 3**), indicating both acquired and transmitted resistance. Mutations conferring resistance to  
201 EMB and PZA also developed independently on multiple branches, producing 19 strains that were resistant to  
202 all four of the first-line drugs used in the standard HRZE therapy. Few strains belonging to this clade  
203 developed resistance to second-line anti-TB drugs, including only eight pre-XDR-TB strains with  
204 fluoroquinolones-resistant mutations in *gyrA* (90V, 94G, 94N) or *gyrB* (461N). The other clades underwent  
205 similar trajectories, acquiring mutations conferring resistance to RIF and other first-line drugs multiple times  
206 in parallel in the descendants of strains with pre-existing INH resistance (**Suppl. Figure 2**).

207

### 208 **Risk of INH resistance for population expansion and resistance accumulation**

209 To evaluate the impact of INH and RIF resistance on the clonal expansion of local TB strains, we used  
210 Bayesian skyline plots to reconstruct the growth of the bacterial populations in the six major clades (**Figure**  
211 **4**). Before the emergence of drug resistance, mainly resistance to INH, the bacterial population of these clades  
212 showed varied patterns of expansion or shrinkage. Irrespective of their previous patterns however, after the  
213 development of INH resistance there followed a period of exponential growth during which the bacterial  
214 populations of these clades expanded for decades. Subsequently, after the acquisition of RIF resistance, the  
215 population of most clades stabilized (Clade E) or decreased (Clades A, B, D, F) (**Figure 4**), and only Clade C  
216 continued to expand while acquiring many RIF-resistance mutations independently on multiple branches.

217 We suspected that strains with pre-existing INH resistance would be more likely to accumulate mutations  
218 conferring RIF resistance than INH-sensitive strains. For example, 87.9% (51/58) of the INH-resistant Clade  
219 C strains acquired RIF resistance, compared to only 19.2% (5/26) of strains on its sister INH-sensitive  
220 branches (**Figure 3**). To quantify the effect of pre-existing INH resistance on the accumulation of RIF  
221 resistance, we tested it as an independent variable in a logistic regression model with the whole dataset. In the  
222 univariable analysis, the development of RIF resistance was significantly associated with strains that had pre-  
223 existing INH resistance, belonged to a genetic cluster (genetic distance  $\leq 5$  SNPs), were isolated from  
224 retreated patients, were isolated in Lhasa, or were sampled in 2006 rather than in 2009/2010 (**Table 4**). These  
225 variables were then included in a multivariable logistic regression, adjusting for age and gender and excluding  
226 cases with missing data. The final model showed that, *M. tuberculosis* strains with pre-existing INH resistance  
227 had an adjusted odds ratio of developing RIF resistance of 3.81 (95% CI: 2.47-5.95) compared to INH-  
228 susceptible strains, and genetic-clustered strains within a 5-SNP distance had an adjusted odds ratio of 2.08  
229 (95% CI:1.37-3.18) compared to non-clustered strains (**Table 4**).

230

## 231 **DISCUSSION**

232 In this study of *M. tuberculosis* isolates from Tibet, China, we characterized evolutionary trajectories for  
233 MDR-TB and demonstrated a high level of transmitted resistance to both INH and RIF drugs. However, six  
234 clades were shown to expand exponentially after acquiring INH-resistance mutations in the 1970s, and mostly  
235 stabilized before accumulating multiple RIF-resistance mutations to become MDR-TB in the late 1990s.  
236 Compared to INH-susceptible strains, strains with mutations conferring INH resistance were found to have a  
237 significantly higher risk of acquiring RIF resistance. Both the historical expansion of INH-resistant strains and  
238 the increased risk of these strains acquiring additional RIF resistance likely contributed to the current high  
239 burden of MDR-TB in Tibet.

240 The rate of genotypic drug-resistance among sampled *M. tuberculosis* isolates in Tibet was extremely high,  
241 with 59.9% of isolates resistant to any anti-TB drug, and 41.0% MDR-TB. Recent transmission contributed  
242 almost half (47.0%) of the MDR-TB cases, using the genetic-clustering threshold of 5 SNPs. This proportion  
243 increased to 69.1% when the genetic-clustering threshold was set at 12 SNPs. The level of recent transmission  
244 of MDR-TB in Tibet was much higher than that in other areas of China, such as Shanghai<sup>15</sup> or Shenzhen<sup>17</sup>  
245 (32% and 25%, respectively, with a 12-SNP threshold), and was similar to the proportions of MDR-TB  
246 attributed to recent transmission in other countries with high MDR-TB burdens, such as Russia (60% with  
247 terminal branch length of  $\leq 5$  SNPs)<sup>14</sup> or South Africa (79% in phylogenetic clades)<sup>18</sup>. However, while the  
248 majority of the MDR-TB burden in these other countries is caused by a few MDR strains that are extensively  
249 transmitted, most MDR-TB strains in Tibet belonged to small genetic-clusters of only 2 to 6 cases. We thus  
250 speculate that the high prevalence of MDR-TB in Tibet is more likely the result of poor TB control than the  
251 high transmissibility of particular strains. Due to relatively poor healthcare infrastructure in Tibet, the  
252 proportion of TB cases tested for drug resistance was low. The Tibet CDC reported that between July 2017  
253 and June 2018, only 8 out of 476 (1.8%) smear-positive TB cases were tested for drug sensitivity and just one  
254 MDR-TB case was diagnosed. The underdiagnosis of MDR-TB in Tibet could result in inappropriate  
255 treatment regimens, poor treatment outcomes and prolonged transmission of MDR-TB strains.

256 We could phylogenetically follow the progression from INH-resistant TB to MDR-TB through the acquisition  
257 of mutations conferring RIF resistance, especially within the six major clades. We showed that strains with  
258 pre-existing INH resistance were more likely to develop RIF resistance, which is consistent with an *in vitro*  
259 experimental study<sup>19</sup> that showed that laboratory-generated INH-resistant strains were more likely to  
260 accumulate RIF-resistant mutations than INH-sensitive strains. In a real-world dataset, a recent meta-analysis  
261 similarly found that treatment of INH-resistant, RIF-sensitive strains with the standard first-line HRZE  
262 regimen resulted in high proportions of unfavourable outcomes, including relapse or treatment failure rate  
263 (15%) and development of MDR-TB (3.6%)<sup>20</sup>. A recent study<sup>21</sup> highlighted the high global prevalence of  
264 INH-resistant TB, with proportions among new and retreated patients of 7.4% and 11.4%, respectively. If  
265 undetected and treated with ineffective regimens, these numerous INH-resistant strains could be transmitted  
266 during prolonged infections, with an increased likelihood of acquiring further resistance.

267 INH resistance is thought to evolve earlier than resistance to the other first-line drugs. A study<sup>22</sup> using a large  
268 global dataset of *M. tuberculosis* whole-genome sequences found that the INH-resistance mutation *katG*



269 S315T overwhelmingly arose before RIF resistance across different lineages and regions. In our study, four of  
270 the six large clades were found to have first acquired the *katG* S315T mutation, and one clade each acquired  
271 the *katG* S315N and *fabG1* promoter -15 C>T mutations. The INH resistance impaired the effectiveness of  
272 triple therapy that was being prescribed at the time, and from the 1970s to 1990s these clades evolved into  
273 large phylo-clusters before RIF, EMB and PZA were introduced into TB treatment in Tibet. From the  
274 phylogenetic trees, we could see that the mutations conferring RIF resistance then occurred independently, in  
275 parallel, on multiple branches of these INH-resistant clades, and subsequently disseminated to cause large  
276 numbers of MDR-TB cases. This pattern differs from several MDR-TB outbreaks reported elsewhere that  
277 were caused by the extensive transmission of a very few dominant MDR-TB strains<sup>14,23</sup>. In a huge outbreak  
278 over four decades in Argentina<sup>24</sup>, RIF resistance was acquired soon after the development of INH resistance.  
279 In London<sup>25</sup>, an MDR-TB outbreak was found to have originated from an INH-resistant strain, but RIF  
280 resistance was acquired only once during transmission. The specific pattern for multiple, independent  
281 acquisitions of RIF resistance among *M. tuberculosis* in Tibet may be a result of the historical expansion of  
282 INH-resistant strains before the implementation of RIF.

283 Half of the samples included in this study came from retreated TB patients, a proportion higher than the usual  
284 rate, but the overall retreatment rate of TB in Tibet is much higher than in other regions of China. According  
285 to a cross-sectional investigation by Tibet CDC in 2014<sup>26</sup>, the proportion of retreated patients reached 37.5%  
286 in Lhasa, and averaged 26.6% in other Tibetan cities. The high percentage of retreated patients in this study  
287 could also partially result from sampling bias at the municipal general hospitals, where the cultures available  
288 for this study were more likely to have been obtained from severe and refractory cases. Correspondingly, the  
289 drug-resistance rates in this study are also higher than the average resistance rates in Tibet. However, the  
290 overrepresentation of resistant strains should not affect our characterization of the evolution of drug  
291 resistance, the history of bacterial population expansion and the contribution of drug resistant strains to the  
292 current TB epidemic in Tibet. Although we found a very high proportion of clustering and inferred  
293 transmission of drug-resistant strains, it is likely that these are underestimates, because our sample contained  
294 only about one-fifth of the culture-confirmed TB patients in Tibet during only the two short periods of time  
295 included in the study.

296 In conclusion, the high proportion of clustering suggests that there is considerable transmission of drug  
297 resistant *M. tuberculosis* in Tibet. The expansion of INH resistant clades from the 1970's through the 1990's  
298 and their increased propensity to acquire RIF resistance likely contributed to the current MDR-TB burden.  
299 Pragmatic strategies should be implemented for the early detection and effective treatment of both INH and  
300 RIF resistant strains.

301

302 **Contribution:** QJ, KLW, and QG designed the study. HCL, LS, MG, XQZ, and JW collected the samples and  
303 data. QJ, QYL, and JEP analysed the data. TGC guided the genomic analysis. JRG and CGY suggested in the

304 epidemiological analysis. QJ, HET, QG drafted the article. All the authors contributed to the manuscript and  
305 reviewed the final version.

306 **Acknowledgements** We thank the physicians and technicians of Tibetan CDC and Chinese CDC for the  
307 collection, culture and storage of clinical samples, and the conduction of the epidemiological review.

308 **Funding:** This work was supported by the National Major Science and Technology Project of China  
309 [2017ZX10201302-006 and 2018ZX10715012-005 to QG, and 2018ZX10101002 to KLW]; and the Natural  
310 Science Foundation of China [91631301 and 81661128043 to QG].

311 **Disclaimer:** The funders had no role in study design, data collection and analysis, decision to publish, or  
312 preparation of the manuscript.

313 **Competing interests:** We declare no competing interests.

314 **Patient consent for publication:** Not required.

315 **Ethics approval:** Ethical approval was obtained from the Ethical Review Board of the Chinese Center for  
316 Disease Control and Prevention.

317 **Data availability statement:** Sequencing reads are deposited in the NCBI (EMBL-EBI) under study  
318 accession number SRP276868.

319

320

## 321 REFERENCE

- 322 1 World Health Organization. Global Tuberculosis Report 2020. Geneva: World Health Organization,  
323 2020.
- 324 2 Li B, Zhang X, Guo J, *et al.* Prevalence of pulmonary tuberculosis in Tibet Autonomous Region,  
325 China, 2014. *Int J Tuberc lung Dis* 2019; **23**: 735–40.
- 326 3 Yang J, Yangla, Bassan-Junda, Li C, Du B. Analysis on the drug resistance of *Mycobacterium*  
327 *tuberculosis* in Lhasa area, Tibet. *J Tibet Univ (in Chinese)* 2014; **29**: 36–9.
- 328 4 Dong H, Shi L, Zhao X, *et al.* Genetic diversity of *Mycobacterium tuberculosis* isolates from Tibetans  
329 in Tibet, China. *PLoS One* 2012; **7**: e33904.
- 330 5 Schiebelhut LM, Abboud SS, Gomez Daglio LE, Swift HF, Dawson MN. A comparison of DNA  
331 extraction methods for high-throughput DNA analyses. *Mol Ecol Resour* 2017; **17**: 721–9.
- 332 6 Walker TM, Ip CL, Harrell RH, *et al.* Whole-genome sequencing to delineate *Mycobacterium*

- 333           *tuberculosis* outbreaks: a retrospective observational study. *Lancet Infect Dis* 2013; **13**: 137–46.
- 334   7       Stamatakis A. RAxML version 8: a tool for phylogenetic analysis and post-analysis of large  
335       phylogenies. *Bioinformatics* 2014; **30**: 1312–3.
- 336   8       Bouckaert R, Vaughan TG, Barido-Sottani J, *et al.* BEAST 2.5: An advanced software platform for  
337       Bayesian evolutionary analysis. *PLoS Comput Biol* 2019; **15**: e1006650–e1006650.
- 338   9       Menardo F, Duchene S, Brites D, Gagneux S. The molecular clock of *Mycobacterium tuberculosis*.  
339       *PLoS Pathog* 2019; **15**: e1008067.
- 340   10       Rambaut A, Drummond AJ, Xie D, Baele G, Suchard MA. Posterior Summarization in Bayesian  
341       Phylogenetics Using Tracer 1.7. *Syst Biol* 2018; **67**: 901–4.
- 342   11       Letunic I, Bork P. Interactive tree of life (iTOL) v3: an online tool for the display and annotation of  
343       phylogenetic and other trees. *Nucleic Acids Res* 2016; **44**: W242–5.
- 344   12       Phelan JE, O’Sullivan DM, Machado D, *et al.* Integrating informatics tools and portable sequencing  
345       technology for rapid detection of resistance to anti-tuberculous drugs. *Genome Med* 2019; **11**: 41.
- 346   13       Coll F, Phelan J, Hill-Cawthorne GA, *et al.* Genome-wide analysis of multi- and extensively drug-  
347       resistant *Mycobacterium tuberculosis*. *Nat Genet* 2018; **50**: 307–16.
- 348   14       Casali N, Nikolayevskyy V, Balabanova Y, *et al.* Evolution and transmission of drug-resistant  
349       tuberculosis in a Russian population. *Nat Genet* 2014; **46**: 279–86.
- 350   15       Yang C, Luo T, Shen X, *et al.* Transmission of multidrug-resistant *Mycobacterium tuberculosis* in  
351       Shanghai, China: a retrospective observational study using whole-genome sequencing and  
352       epidemiological investigation. *Lancet Infect Dis* 2017; **17**: 275–84.
- 353   16       Gygli SM, Borrell S, Trauner A, Gagneux S. Antimicrobial resistance in *Mycobacterium tuberculosis*:  
354       mechanistic and evolutionary perspectives. *FEMS Microbiol Rev* 2017; **41**: 354–73.
- 355   17       Jiang Q, Liu Q, Ji L, *et al.* Citywide transmission of MDR-TB under China’s rapid urbanization: a  
356       retrospective population-based genomic spatial epidemiological study. *Clin Infect Dis* 2020; **71**: 142–  
357       51.
- 358   18       Brown TS, Challagundla L, Baugh EH, *et al.* Pre-detection history of extensively drug-resistant  
359       tuberculosis in KwaZulu-Natal, South Africa. *Proc Natl Acad Sci U S A* 2019; **116**: 23284–91.
- 360   19       Bergval I, Kwok B, Schuitema A, *et al.* Pre-existing isoniazid resistance, but not the genotype of  
361       *Mycobacterium tuberculosis* drives rifampicin resistance codon preference in vitro. *PLoS One* 2012; **7**:  
362       e29108.
- 363   20       Gegia M, Winters N, Benedetti A, van Soolingen D, Menzies D. Treatment of isoniazid-resistant  
364       tuberculosis with first-line drugs: a systematic review and meta-analysis. *Lancet Infect Dis* 2017; **17**:  
365       223–34.

- 366 21 Dean AS, Zignol M, Cabibbe AM, *et al.* Prevalence and genetic profiles of isoniazid resistance in  
367 tuberculosis patients: A multicountry analysis of cross-sectional data. *PLoS Med* 2020; **17**: e1003008.
- 368 22 Manson AL, Cohen KA, Abeel T, *et al.* Genomic analysis of globally diverse *Mycobacterium*  
369 *tuberculosis* strains provides insights into the emergence and spread of multidrug resistance. *Nat Genet*  
370 2017; **49**: 395–402.
- 371 23 Cohen KA, Abeel T, Manson McGuire A, *et al.* Evolution of Extensively Drug-Resistant Tuberculosis  
372 over Four Decades: Whole Genome Sequencing and Dating Analysis of *Mycobacterium tuberculosis*  
373 Isolates from KwaZulu-Natal. *PLoS Med* 2015; **12**: e1001880.
- 374 24 Eldholm V, Monteserin J, Rieux A, *et al.* Four decades of transmission of a multidrug-resistant  
375 *Mycobacterium tuberculosis* outbreak strain. *Nat Commun* 2015; **6**: 7119.
- 376 25 Casali N, Broda A, Harris SR, Parkhill J, Brown T, Drobniewski F. Whole Genome Sequence Analysis  
377 of a Large Isoniazid-Resistant Tuberculosis Outbreak in London: A Retrospective Observational  
378 Study. *PLoS Med* 2016; **13**: e1002137.
- 379 26 Tibet CDC. The third epidemiological sampling survey of tuberculosis in Tibet Autonomous Region in  
380 2014 (in Chinese). 2014.

381

382

**Table 1. Basic demographic characteristics of tuberculosis patients in Tibet and the genetic characteristics of their clinical isolates, stratified by tuberculosis treatment history**

|                           | Total<br>N=576 | New cases<br>N=273 | Retreated cases<br>N=288 | $\chi^2$ | <i>P</i> value |
|---------------------------|----------------|--------------------|--------------------------|----------|----------------|
| Median Age (IQR), years   | 32 (25-43)     | 32 (23-44)         | 33 (26-43)               | 1.12     | 0.263          |
| Gender, n (%)             |                |                    |                          | 4.12     | 0.042          |
| Male                      | 325 (58.0)     | 146 (53.5)         | 179 (62.2)               |          |                |
| Female                    | 235 (42.0)     | 126 (46.2)         | 109 (37.8)               |          |                |
| Occupation                |                |                    |                          | 22.67    | <0.001         |
| Farmer                    | 298 (53.1)     | 146 (53.5)         | 152 (52.8)               |          |                |
| Worker                    | 43 (7.7)       | 20 (7.3)           | 23 (8.0)                 |          |                |
| Student                   | 55 (9.8)       | 42 (15.4)          | 13 (4.5)                 |          |                |
| Other                     | 180 (31.3)     | 65 (23.8)          | 100 (34.7)               |          |                |
| Location, n (%)           |                |                    |                          | 9.30     | 0.002          |
| Lhasa                     | 305 (53.1)     | 164 (60.1)         | 136 (47.2)               |          |                |
| Other                     | 271 (47.0)     | 109 (39.9)         | 152 (52.8)               |          |                |
| Sample year, n (%)        |                |                    |                          | 0.46     | 0.794          |
| 2006                      | 177 (30.7)     | 81 (30.0)          | 82 (28.5)                |          |                |
| 2009                      | 172 (30.0)     | 80 (29.3)          | 92 (31.9)                |          |                |
| 2010                      | 227 (39.4)     | 112 (41.0)         | 114 (39.6)               |          |                |
| Smear status              |                |                    |                          | 12.29    | 0.006          |
| Negative or scanty        | 245 (42.5)     | 137 (50.2)         | 108 (37.5)               |          |                |
| 1+                        | 142 (25.3)     | 68 (24.9)          | 74 (25.7)                |          |                |
| 2+                        | 94 (16.8)      | 34 (12.5)          | 60 (20.8)                |          |                |
| 3+                        | 80 (14.3)      | 34 (12.5)          | 46 (16.0)                |          |                |
| Lineage, n (%)            |                |                    |                          | 0.26     | 0.878          |
| Lineage 2                 | 524 (91.0)     | 247 (90.5)         | 264 (91.7)               |          |                |
| Lineage 4                 | 36 (6.3)       | 18 (6.6)           | 17 (5.9)                 |          |                |
| Lineage 3                 | 16 (2.8)       | 8 (2.9)            | 7 (2.4)                  |          |                |
| Genetic resistance, n (%) |                |                    |                          | 106.99   | <0.001         |
| Pan-susc.                 | 231 (40.1)     | 160 (58.6)         | 67 (23.3)                |          |                |
| DR                        | 109 (18.9)     | 61 (22.3)          | 47 (16.3)                |          |                |
| MDR                       | 187 (32.5)     | 42 (15.4)          | 136 (47.2)               |          |                |
| Pre-XDR                   | 41 (7.1)       | 10 (3.7)           | 31 (10.8)                |          |                |
| XDR                       | 8 (1.4)        | 0 (0)              | 7 (2.4)                  |          |                |
| Genetic clustering, n (%) |                |                    |                          |          |                |
| 1-SNP                     | 105 (18.2)     | 44 (16.1)          | 57 (19.8)                | 1.28     | 0.258          |
| 5-SNP                     | 216 (37.5)     | 93 (34.1)          | 118 (41.0)               | 2.85     | 0.091          |
| 12-SNP                    | 339 (58.9)     | 153 (56.0)         | 176 (61.1)               | 1.48     | 0.223          |
| 25-SNP                    | 444 (77.1)     | 208 (76.2)         | 222 (77.1)               | 0.06     | 0.803          |
| 50-SNP                    | 509 (88.4)     | 238 (87.2)         | 257 (89.2)               | 0.57     | 0.450          |

Abbreviations: IQR=interquartile range; Pan-susc. = pan-susceptible; DR = Drug Resistant but not MDR-TB; MDR-TB = MultiDrug-Resistant tuberculosis; XDR = eXtensively Drug-Resistant; SNP = single nucleotide polymorphism.

Note: Demographic data (tuberculosis treatment history, age and gender) was missing for 16 cases.

389

**Table 2. Genetic and phylogenetic clustering of *M. tuberculosis* strains with the principal mutations**

390

**conferring isoniazid (INH) or rifampicin (RIF) resistance**

| <b>Profile/mutation</b> | <b>Sum, n (%)</b> | <b>5-SNP<br/>clustering,<br/>n (%)</b> | <b>12-SNP<br/>clustering,<br/>n (%)</b> | <b>Phylo-<br/>clustering,<br/>n (%)</b> | <b>Phylo-cluster<br/>size,<br/>median (range)</b> |
|-------------------------|-------------------|----------------------------------------|-----------------------------------------|-----------------------------------------|---------------------------------------------------|
| Resistance profile      |                   |                                        |                                         |                                         |                                                   |
| Pan-Susceptible         | 231 (40.1)        | 72 (31.2)                              | 121 (52.4)                              | -                                       | -                                                 |
| Resistant TB            | 109 (18.9)        | 33 (30.3)                              | 55 (50.5)                               | -                                       | -                                                 |
| MDR-TB                  | 236 (41.0)        | 111 (47.0)                             | 163 (69.1)                              | -                                       | -                                                 |
| INH resistance          |                   |                                        |                                         |                                         |                                                   |
| Total resistant         | 284 (100.0)       | 124 (43.7)                             | 190 (66.9)                              | 221 (77.8)                              | -                                                 |
| <i>katG</i> S315T       | 177 (62.3)        | 74 (41.8)                              | 125 (70.6)                              | 155 (87.6)                              | 8.6 (2-58)                                        |
| <i>fabG1</i> -15 C>T    | 28 (9.9)          | 17 (60.7)                              | 21 (75.0)                               | 24 (85.7)                               | 4.8 (2-12)                                        |
| <i>katG</i> S315N       | 19 (6.7)          | 4 (21.1)                               | 8 (42.1)                                | 13 (68.4)                               | 4.3 (2-8)                                         |
| <i>ahpC</i> -52 C>T     | 12 (4.2)          | 8 (66.7)                               | 9 (75.0)                                | 7 (58.3)                                | 3.5 (2-8)                                         |
| <i>katG</i> deletion    | 10 (3.5)          | 8 (80.0)                               | 8 (80.0)                                | 8 (80.0)                                | 2.7 (2-3)                                         |
| RIF resistance          |                   |                                        |                                         |                                         |                                                   |
| Total resistant         | 280 (100.0)       | 126 (45.0)                             | 185 (66.1)                              | 174 (62.1)                              | -                                                 |
| <i>rpoB</i> S450L       | 99 (35.4)         | 37 (37.4)                              | 58 (58.6)                               | 59 (59.6)                               | 3.1 (2-7)                                         |
| <i>rpoB</i> H445Y       | 42 (15.0)         | 22 (52.4)                              | 28 (68.3)                               | 28 (68.3)                               | 4.0 (2-6)                                         |
| <i>rpoB</i> L452P       | 25 (8.9)          | 6 (24.0)                               | 13 (52.0)                               | 9 (36.0)                                | 2.3 (2-3)                                         |
| <i>rpoB</i> L430P       | 23 (8.2)          | 11 (47.8)                              | 17 (73.9)                               | 17 (73.9)                               | 3.4 (2-4)                                         |
| <i>rpoB</i> H445D       | 22 (7.9)          | 11 (50.0)                              | 16 (72.7)                               | 15 (68.2)                               | 3.0 (2-4)                                         |
| <i>rpoB</i> H445R       | 16 (5.7)          | 8 (50.0)                               | 13 (81.3)                               | 11 (68.8)                               | 3.7 (2-6)                                         |

391

Abbreviations: TB=tuberculosis; MDR-TB = MultiDrug-Resistant tuberculosis; INH, isoniazid; RIF, rifampicin; SNP = single

392

nucleotide polymorphism.

393

**Table 3. Accumulation of mutations conferring drug resistance for anti-tuberculosis drugs among the six major clades A-F**

| Clade   | Initial resistance mutation      | Estimated year of first INH resistance<br>(95% credible intervals) | # phylo-clustered strains (+ # sister branches) | # strains with resistance / # mutation accumulation events |      |      |       |       |       |     |     | Resistant to # drugs per strain |
|---------|----------------------------------|--------------------------------------------------------------------|-------------------------------------------------|------------------------------------------------------------|------|------|-------|-------|-------|-----|-----|---------------------------------|
|         |                                  |                                                                    |                                                 | INH                                                        | SM   | PAS  | RIF   | EMB   | PZA   | FQ  | SLD |                                 |
| Clade A | <i>katG</i> S315N                | 1972.81 (1957.70-1986.26)                                          | 8 (+4)                                          | 8/1                                                        | 7/4  | 0    | 6/4   | 3/2   | 2/2   | 0   | 0   | 3.3                             |
| Clade B | <i>katG</i> S315T                | 1975.36 (1961.07-1987.82)                                          | 12 (+10)                                        | 12/2                                                       | 12/1 | 2/1  | 9/4   | 9/3   | 6/1   | 3/2 | 0   | 4.8                             |
| Clade C | <i>katG</i> S315T                | 1967.55 (1957.58-1977.10)                                          | 58 (+26)                                        | 58/1                                                       | 58/2 | 58/1 | 51/23 | 35/13 | 21/11 | 8/6 | 0   | 5.0                             |
| Clade D | <i>katG</i> S315T                | 1989.69 (1980.47-1998.02)                                          | 13 (+3)                                         | 13/1                                                       | 13/1 | 4/2  | 11/4  | 3/4   | 4/1   | 4/1 | 3/1 | 4.2                             |
| Clade E | <i>katG</i> S315T                | 1973.72 (1964.21-1983.33)                                          | 31 (+0)                                         | 31/1                                                       | 31/1 | 0    | 26/14 | 16/11 | 7/5   | 7/6 | 4/3 | 4.2                             |
| Clade F | <i>fabG1</i> promoter -15<br>C>T | 1969.29 (1954.49-1982.62)                                          | 12 (+1)                                         | 12/4                                                       | 3/3  | 0    | 12/9  | 10/9  | 6/3   | 0   | 3/3 | 4.2                             |

Abbreviations: INH, isoniazid; SM, streptomycin; PAS, P-aminosalicylic acid; RIF, rifampicin; EMB, ethambutol; PZA, pyrazinamide; FQ, fluoroquinolones; SLD, second-line injectable drugs (amikacin, kanamycin, capreomycin).

**Table 4. Risk factors for the development of rifampicin (RIF) resistance in univariable and multivariable logistic regression models**

|                                   | RIF-resistant strains<br>N=280, m±sd/n (%) | RIF-sensitive strains<br>N=296, m±sd/n (%) | Univariable regression        |                | Multivariable regression    |                |
|-----------------------------------|--------------------------------------------|--------------------------------------------|-------------------------------|----------------|-----------------------------|----------------|
|                                   |                                            |                                            | Unadjusted odds ratio (95%CI) | <i>P</i> value | Adjusted odds ratio (95%CI) | <i>P</i> value |
| Age, years*                       | 33.8 ± 14.7                                | 34.7 ±15.6                                 | 1.00 (0.99-1.01)              | 0.481          | 1.00 (0.99-1.01)            | 0.899          |
| Male Gender*                      | 160 (59.5)                                 | 165 (56.7)                                 | 1.12 (0.80-1.57)              | 0.506          | 0.93 (0.61-1.41)            | 0.731          |
| Sampled in Lhasa                  | 127 (45.4)                                 | 173 (58.4)                                 | 0.62 (0.44-0.86)              | 0.004          | 0.72 (0.48-1.08)            | 0.109          |
| Sampled in 2006                   | 98 (35.0%)                                 | 79 (26.7)                                  | 1.48 (1.04-2.11)              | 0.031          | 1.74 (1.11-2.74)            | 0.016          |
| Clustering ≤ 5 SNPs               | 126 (45.0)                                 | 90 (30.4)                                  | 1.87 (1.33-2.64)              | <0.001         | 2.08 (1.37-3.18)            | 0.001          |
| Pre-existing isoniazid resistance | 135 (48.2)                                 | 58 (19.6)                                  | 3.82 (2.65-5.56)              | <0.001         | 3.81 (2.47-5.95)            | <0.001         |
| TB history*                       | 205 (76.2)                                 | 83 (28.4)                                  | 8.07 (5.55-11.85)             | <0.001         | 8.14 (5.43-12.38)           | <0.001         |

Note: \*Demographic data was missing for 16 cases, which were excluded from the multivariable regression.



## FIGURE LEGENDS

**Figure 1. Genetic structure of prevalent *M. tuberculosis* in Tibet.** The maximum-likelihood phylogeny tree of 576 *M. tuberculosis* clinical isolates sampled during years 2006 and 2009-2010 in Tibet, was rooted at midpoint with key nodes gaining a bootstrap value over 0.7. Bootstrap values are shown as numbers on major nodes. Coloured branches show three identified lineages: Beijing strains (Lineage 2, L2) in blue, (Modern Beijing sub-lineage L2.3 in light blue), Central Asian Strain (CAS) (L3) in purple, and Euro-American lineage (L4) in orange. The innermost surrounding circle indicates the genotypic resistance profile of each strain, including pan-susceptible (white), drug-resistant (yellow), MDR (orange), and XDR strains (black). The outermost surrounding circles indicate genetic clustering with thresholds of 1-, 5-, 12-, and 25-SNP distances. Major drug-resistant clades are labelled A-F.

**Figure 2. Distribution of minimum genetic distance and accumulated clustering rates overall, and stratified by strain lineage and drug resistance profile.** Vertical lines indicate the proportions of strains in 5-SNP, 12-SNP, 25-SNP and 50-SNP clusters, respectively. “Drug-resistant” means drug-resistant tuberculosis but not MDR-TB. Most strains (88.4%, 509/576) were separated from another strain by no more than 50 SNPs, and the proportions of strains separated by up to 5, 12 or 25 SNPs from another isolate were 27.5%, 58.9% and 77.1%, respectively.

**Figure 3. Determination of acquisition or transmission of resistance-conferring mutations.** The left side shows a dated phylogeny tree of Clade C, with blue and red branches indicating transmitted resistance to INH and RIF, respectively. The right side shows various resistance mutations in different panels with colors indicating resistance to the corresponding drugs, as labelled above. The blue arrow points to nodes where INH resistance mutations occurred with the approximate dates in blue, while red arrows and dates indicate the occurrence of RIF-resistance mutations transmitted to three or more strains. Abbreviations: INH, isoniazid; SM, streptomycin; PAS, P-aminosalicylic acid; RIF, rifampicin; EMB, ethambutol; PZA, pyrazinamide; FQ, fluoroquinolones

**Figure 4. The effective population size of the six large clades A-F.** Blue and red dash lines indicating the acquisition of isoniazid (INH) and rifampicin (RIF) mutations, respectively. Note, the scales vary.



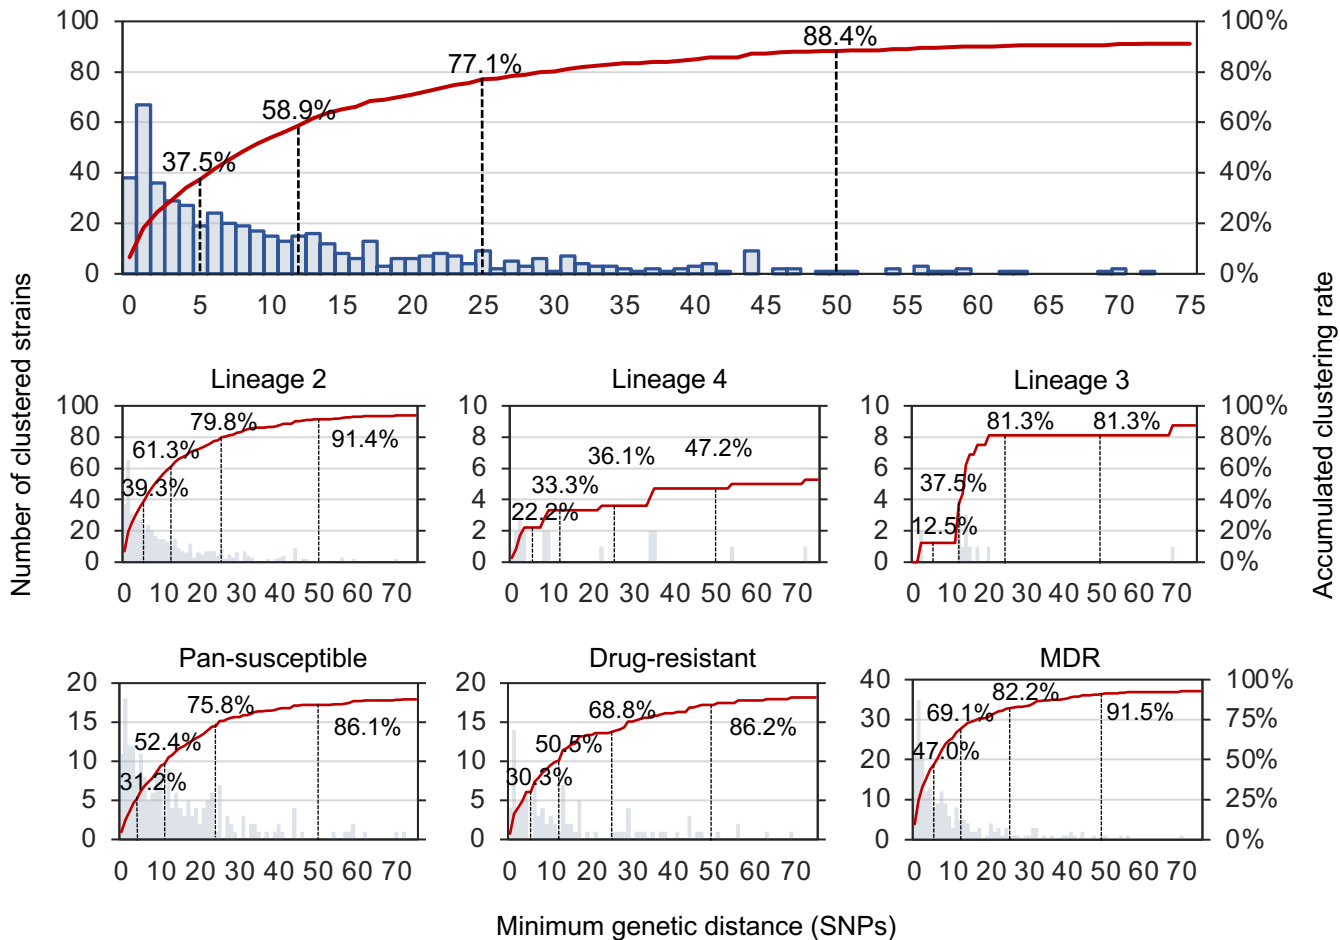

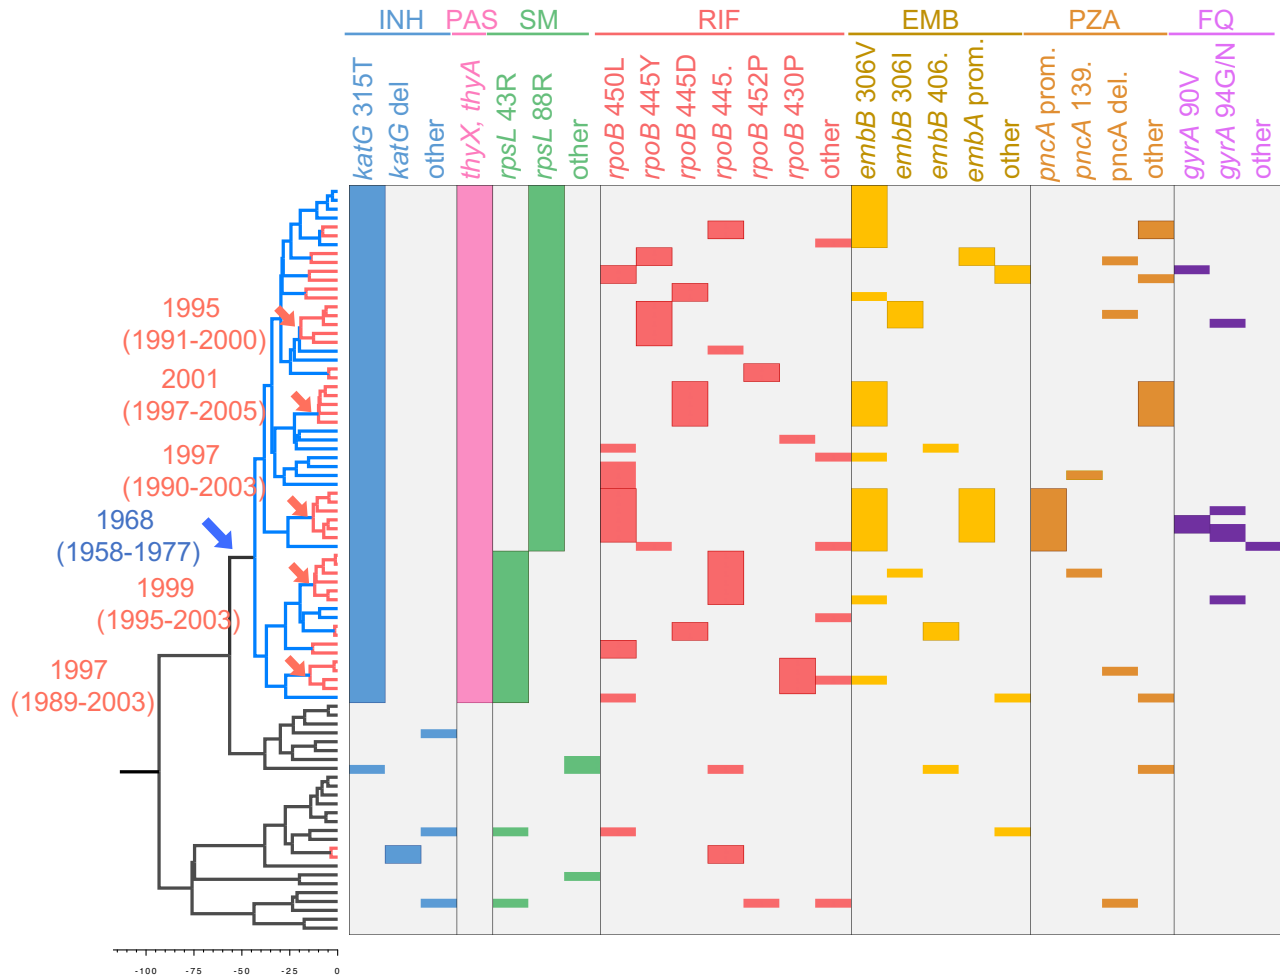

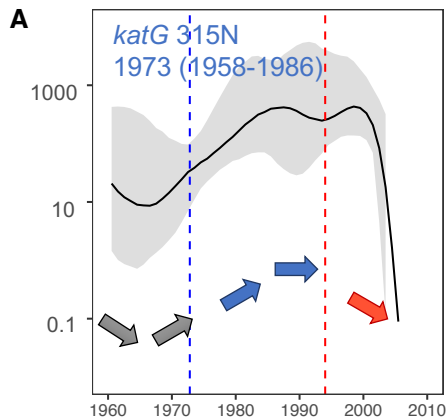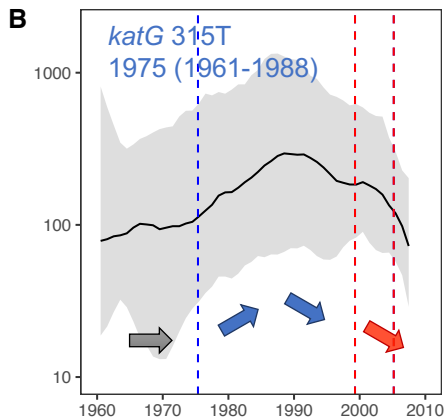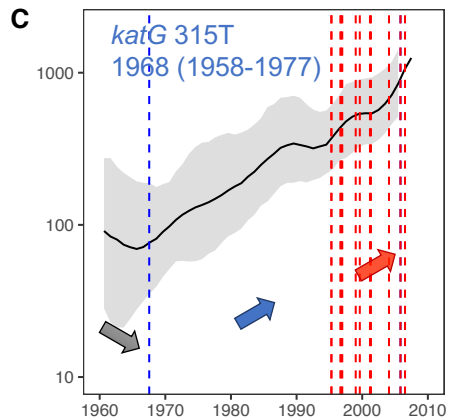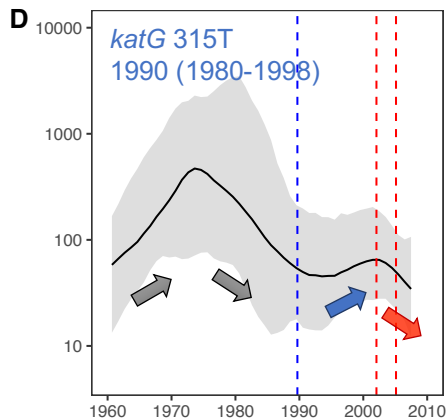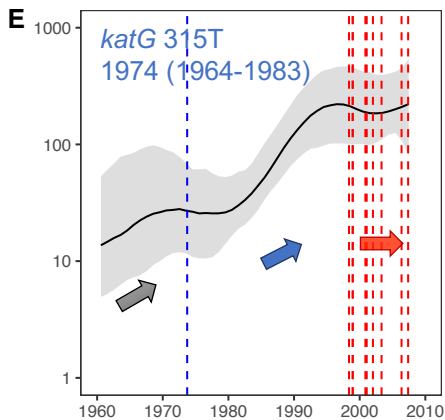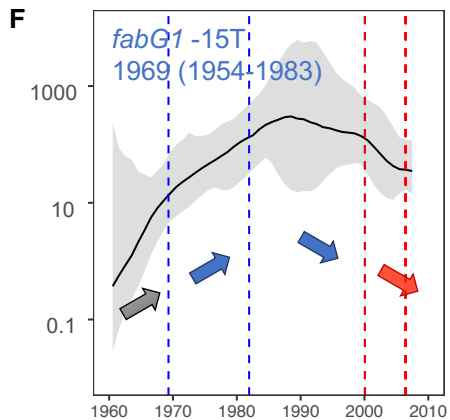

Source: https://www.medrxiv.org/content/10.1101/2021.02.19.21252065v1.full.pdf
